# Supplementary material
Source: publisher figshare collection journal article supplement (https://acs.figshare.com/ndownloader/files/5898396)
Supplement: Supplementary file 1 [file 5898396]

HEADER
HETATM    1  C     2    2        0.958   0.858   0.084
HETATM    2  C     2    2       -0.070   1.175   1.154
HETATM    3  C     2    2       -1.243   0.505   1.226
HETATM    4  C     2    2       -1.551  -0.593   0.275
HETATM    5  C     2    2       -0.440  -1.183  -0.533
HETATM    6  C     2    2        0.963  -0.640  -0.327
HETATM    7  H     2    2        0.147   1.995   1.835
HETATM    8  H     2    2       -1.995   0.759   1.969
HETATM    9  O     2    2       -1.388  -0.246  -1.221
HETATM   10  O     2    2        1.544  -1.507   0.701
HETATM   11  O     2    2        0.746   1.680  -1.118
HETATM   12  H     2    2       -2.439  -1.190   0.455
HETATM   13  H     2    2       -0.501  -2.216  -0.866
HETATM   14  H     2    2        1.532  -0.709  -1.266
HETATM   15  H     2    2        1.961   1.138   0.422
HETATM   16  H     2    2       -0.149   1.460  -1.471
HETATM   17  H     2    2        2.515  -1.384   0.745
